# Supplementary figures and images for: Testing the performance of risk prediction models to determine progression to referable diabetic retinopathy in an Irish type 2 diabetes cohort
Source: HighWire-hosted journal article supplement (doi:10.1136/bjophthalmol-2020-318570), 2021-04-26

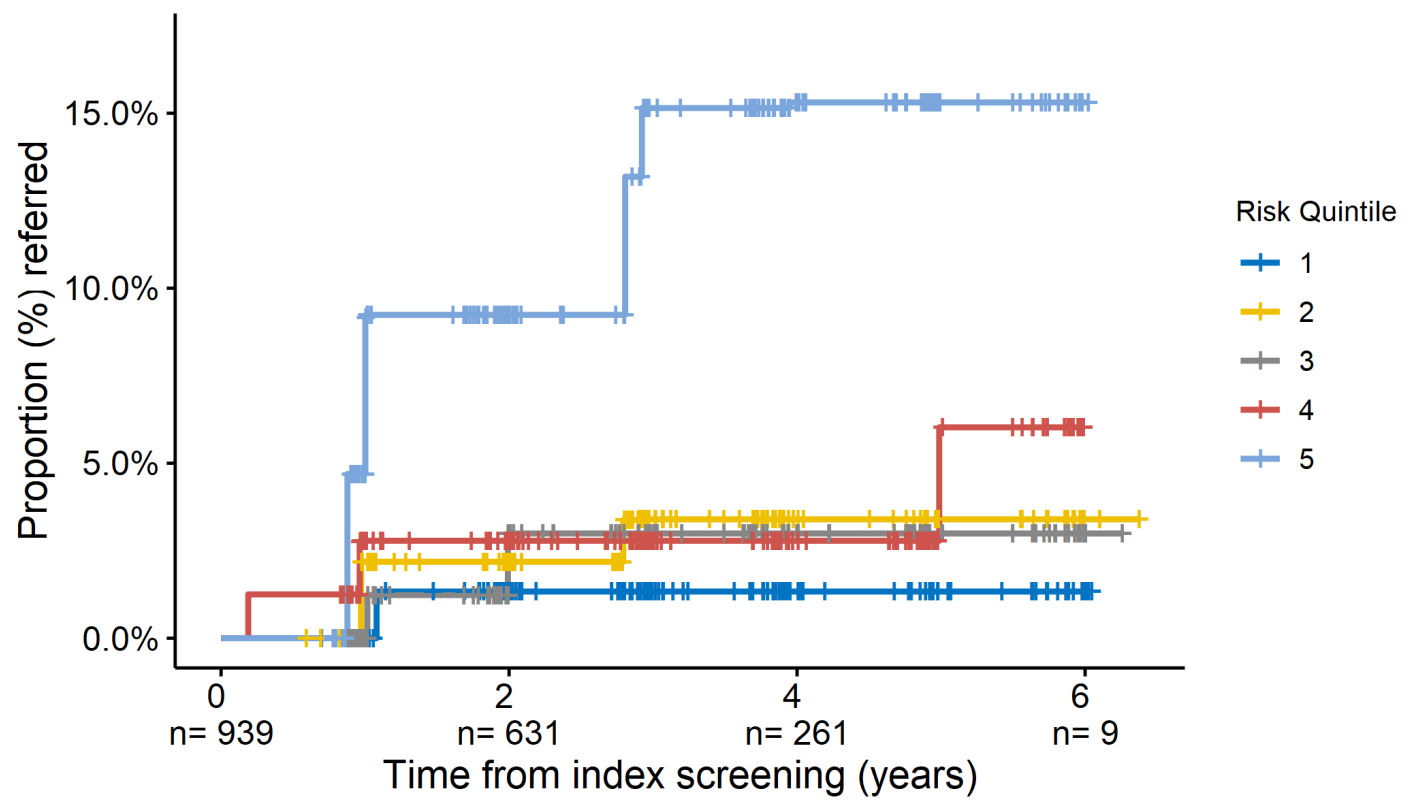

Supplement: bjophthalmol-2020-318570supp002_data_supplement.pdf [file bjophthalmol-2020-318570supp002_data_supplement.pdf]

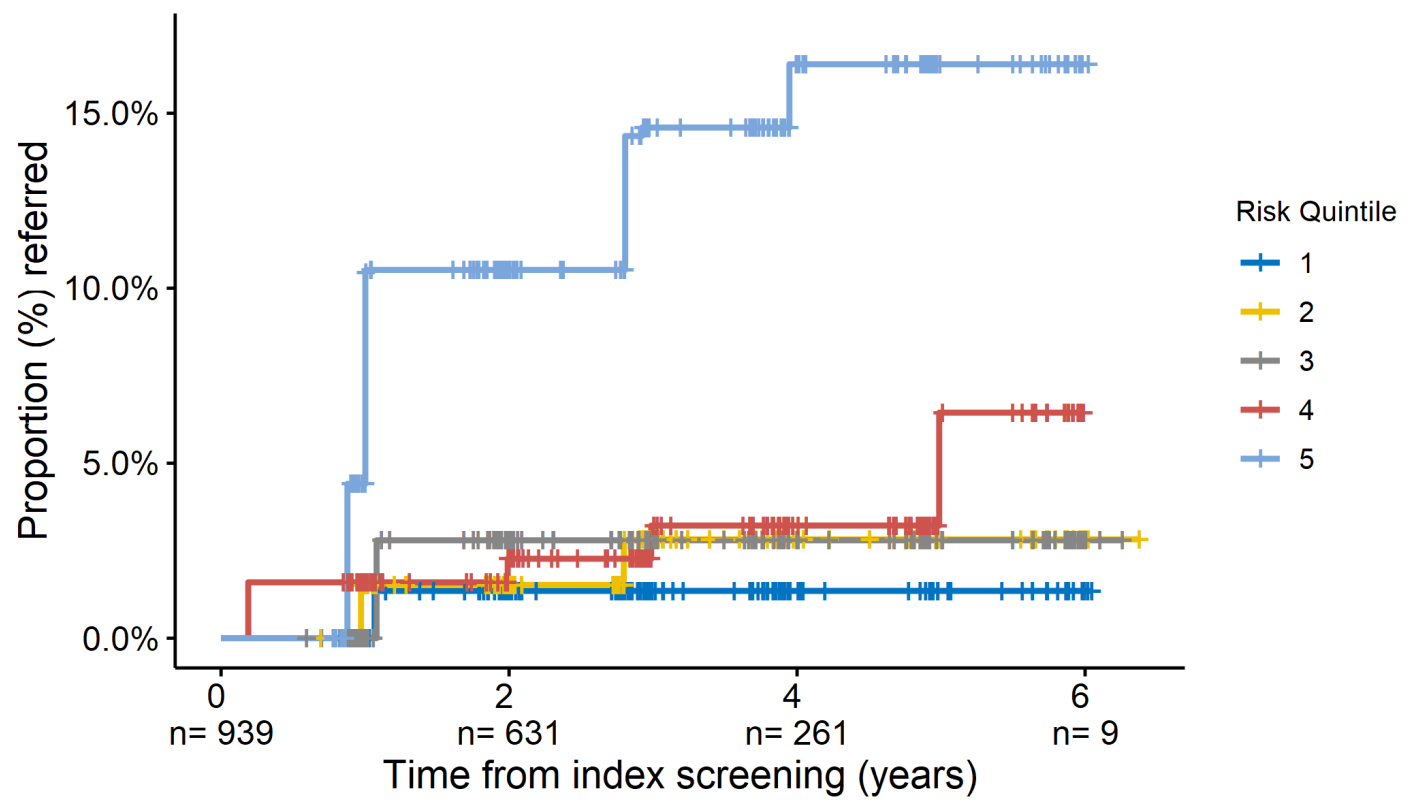

Supplement: bjophthalmol-2020-318570supp003_data_supplement.pdf [file bjophthalmol-2020-318570supp003_data_supplement.pdf]
